# Supplementary material
Source: PubMed Central journal article supplement (PMC7646810)
Supplement: tpmd200706.SD1.pdf [file tpmd200706.SD1.pdf]

A

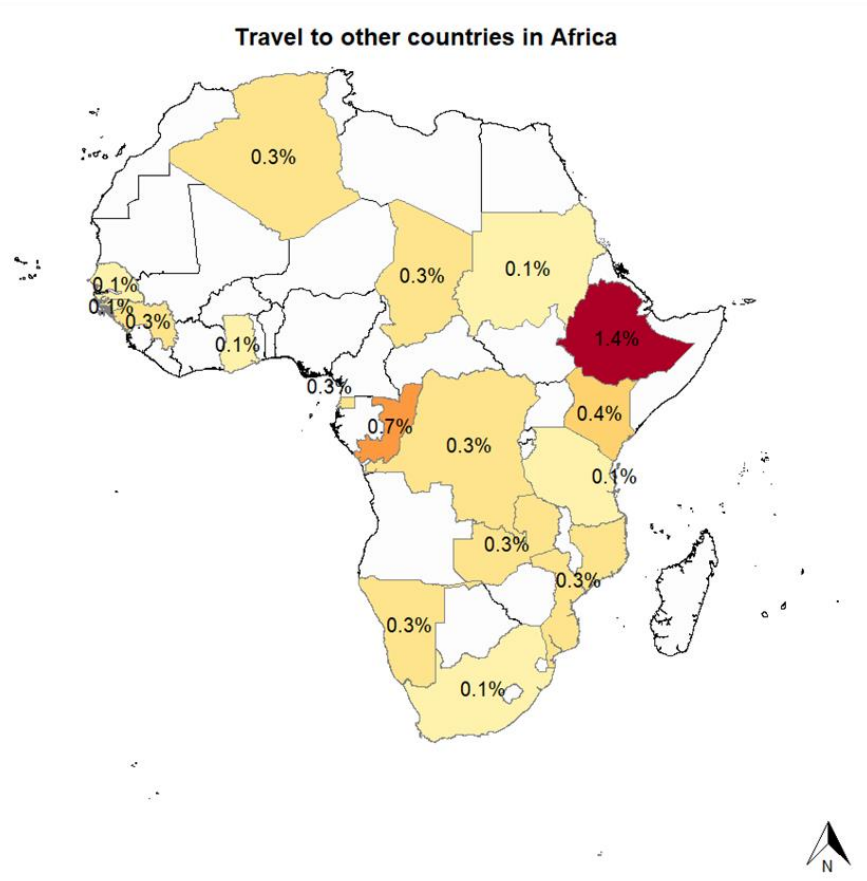

B

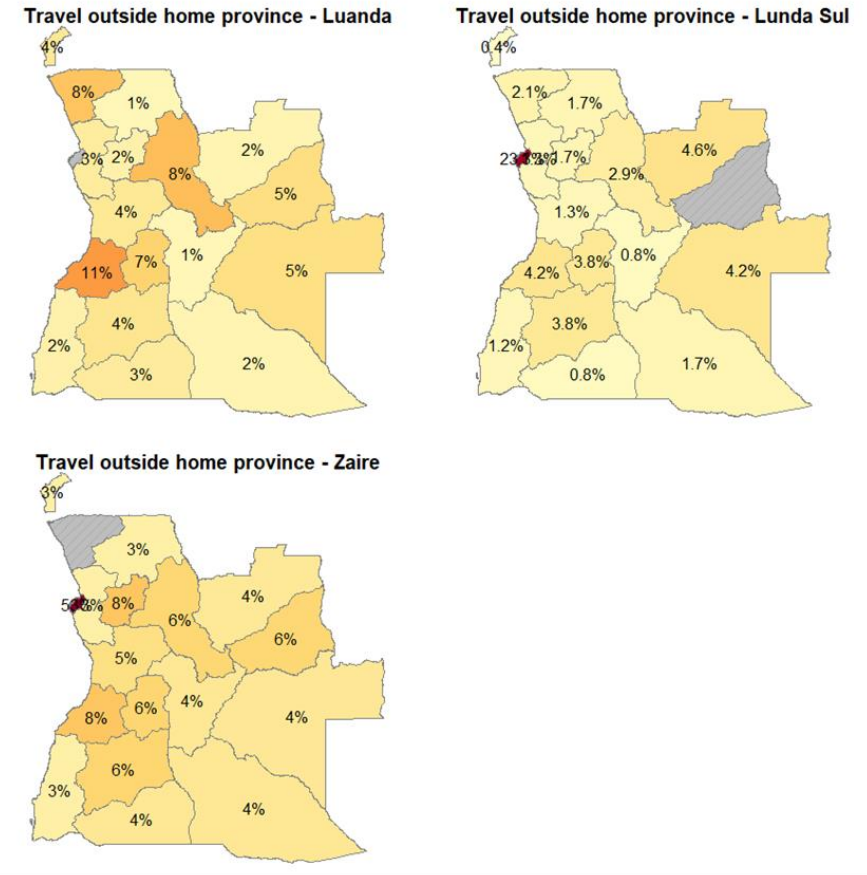

**Supplementary Figure S1.** Rates of reported travel to other African countries (A) and travel outside home province in Angola (B) in Asian migrants surveyed in Angola, 2019.

Number of *P. falciparum* antigen positivity

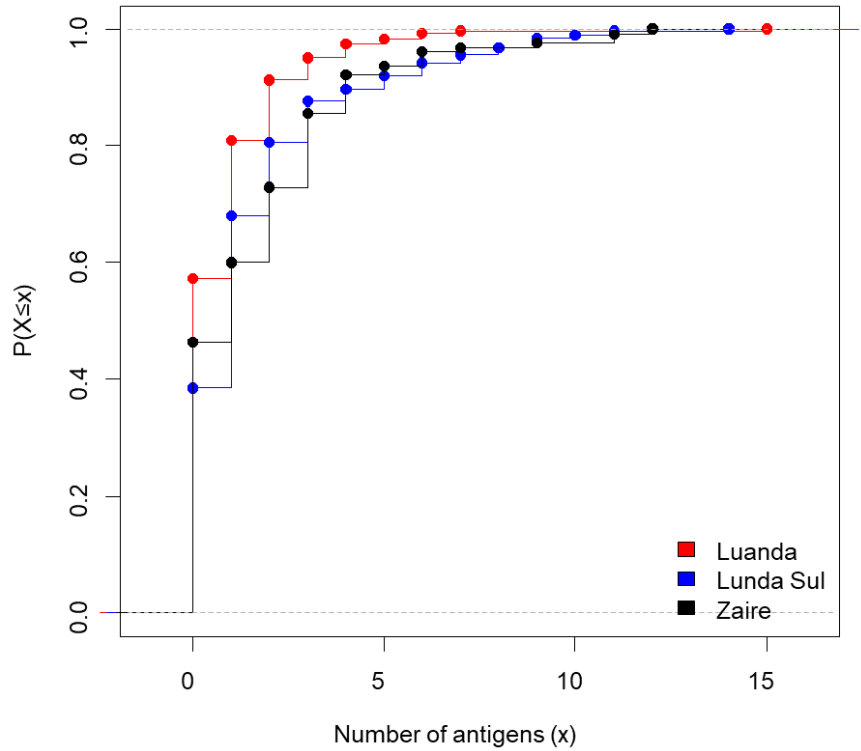

**Supplementary Figure S2.** Empiric cumulative distribution function showing 1-proportion of with seropositivity to n *Plasmodium falciparum* antigens in Asian migrants to Angola, 2019

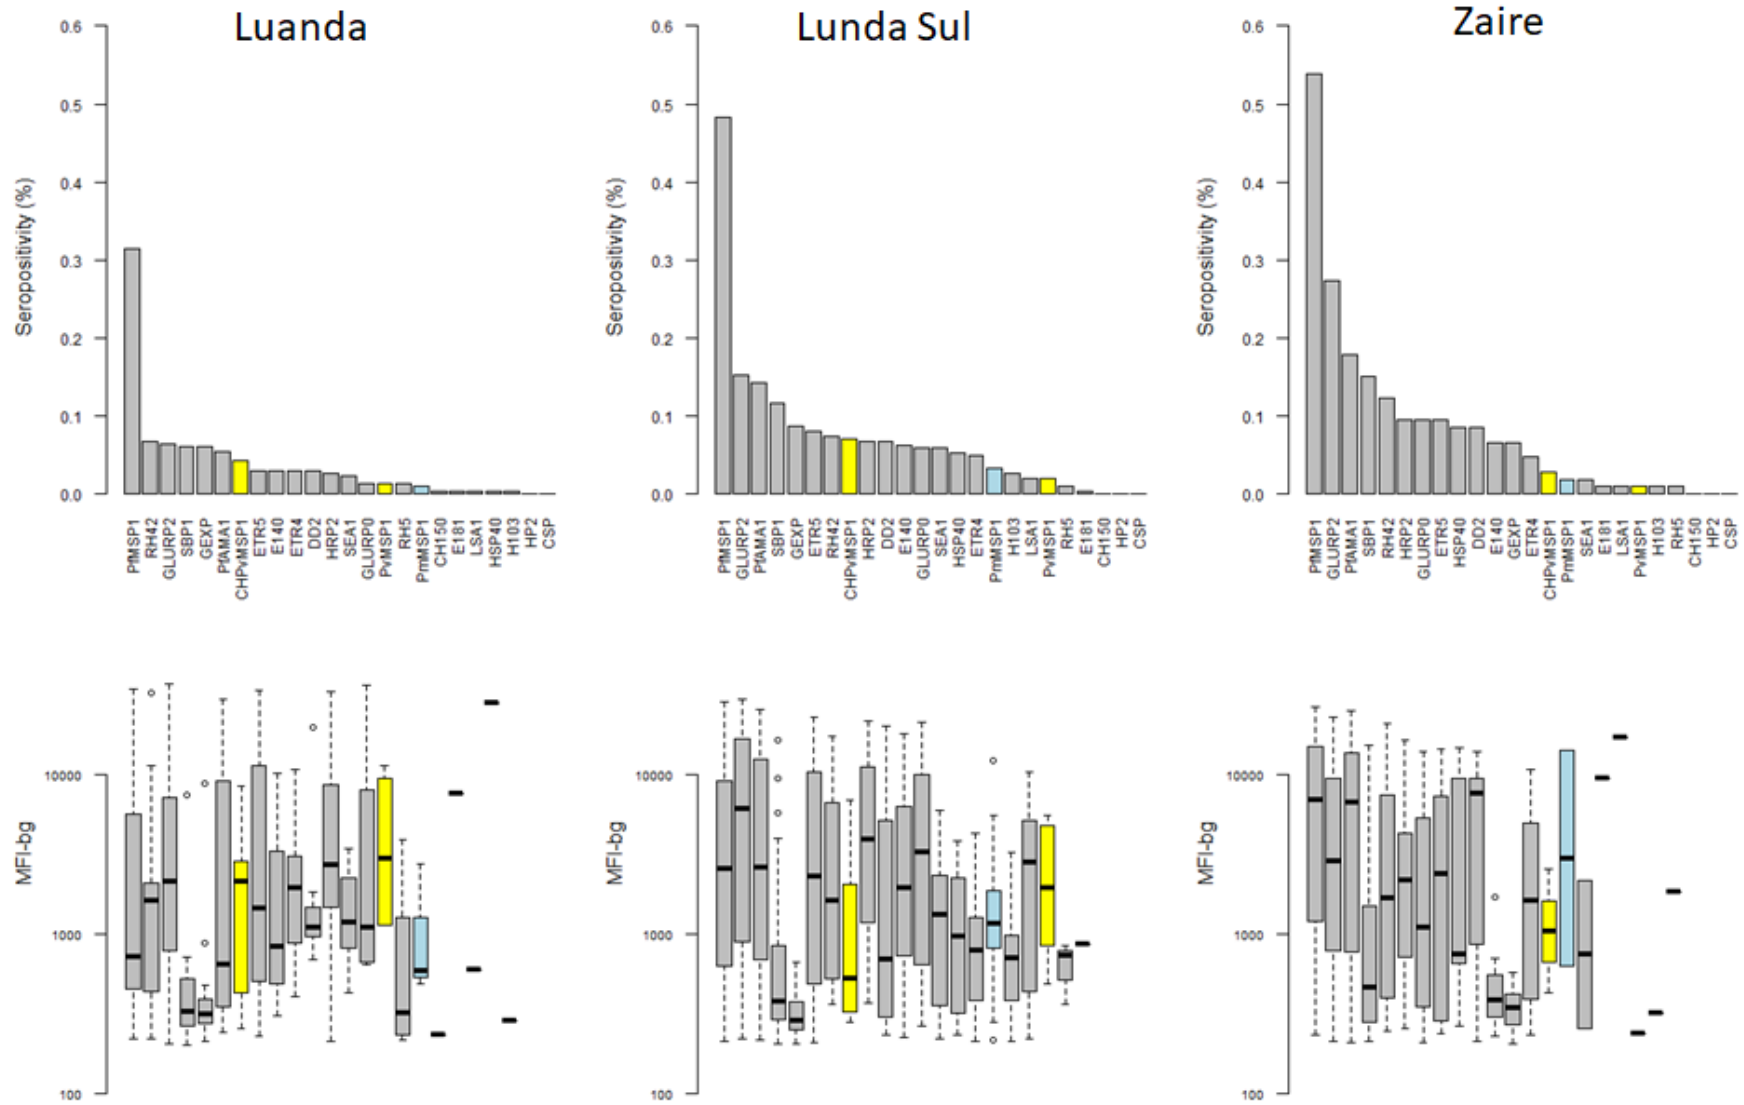

**Supplementary Figure S3:** Prevalence of antibody seropositivity (top panels) and strength of antibody response in those positive (bottom panels) using a panel of *Plasmodium* antigens for Asian migrants to Angola, 2019, stratifying by province. MFI-bg: median fluorescence intensity - background

**Supplementary Table S1.** Panel of antigens to assess past *Plasmodium* exposure

| Abbreviation | Antigen name  | Host infection stage | Full name                                    | Organism                          |
|--------------|---------------|----------------------|----------------------------------------------|-----------------------------------|
| csp          | PfCSP         | Sporozoite           | Circumsporozoite protein                     | <i>P. falciparum</i>              |
| lsa1         | LSA1          | Hepatocyte           | Liver-stage antigen 1                        | <i>P. falciparum</i>              |
| ch150        | MSP2_CH150/9  | Erythrocyte          | Merozoite surface protein 2                  | <i>P. falciparum</i> CH150 strain |
| Pfmsp1       | PfMSP1-19     | Erythrocyte          | Merozoite surface protein 1, 19kD            | <i>P. falciparum</i>              |
| Pfama1       | PfAMA1-N      | Erythrocyte          | Apical membrane antigen 1, N terminus        | <i>P. falciparum</i>              |
| hrp2         | HRP2          | Erythrocyte          | Histidine rich protein 2                     | <i>P. falciparum</i>              |
| etr5         | Etramp 5 ag 1 | Erythrocyte          | Early transcribed membrane protein 5         | <i>P. falciparum</i>              |
| hsp40        | HSP40 ag 1    | Erythrocyte          | Heat shock protein 40                        | <i>P. falciparum</i>              |
| h103         | H103/MSP11    | Erythrocyte          | Merozoite surface protein 11                 | <i>P. falciparum</i>              |
| etr4         | Etramp 4 ag 2 | Erythrocyte          | Early transcribed membrane protein 4         | <i>P. falciparum</i>              |
| gexP         | GEXP18        | Erythrocyte          | Gametocyte-exported protein 18               | <i>P. falciparum</i>              |
| sea1         | SEA-1         | Erythrocyte          | Schizont egress antigen 1                    | <i>P. falciparum</i>              |
| e181         | EBA181 RIII-V | Erythrocyte          | Erythrocyte binding antigen 181              | <i>P. falciparum</i>              |
| rh5          | Rh5.1         | Erythrocyte          | Reticulocyte binding homologue 5             | <i>P. falciparum</i>              |
| sbp1         | SBP1          | Erythrocyte          | Skeleton binding protein 1                   | <i>P. falciparum</i>              |
| hp2          | Hyp2          | Erythrocyte          | Exported putative protein                    | <i>P. falciparum</i>              |
| glurp0       | GLURP.R0      | Erythrocyte          | Glutamate-rich protein R0 fragment           | <i>P. falciparum</i>              |
| glurp2       | GLURP.R2      | Erythrocyte          | Glutamate-rich protein R2 fragment           | <i>P. falciparum</i>              |
| e140         | EBA140 RIII-V | Erythrocyte          | Erythrocyte binding antigen 140              | <i>P. falciparum</i>              |
| rh42         | Rh4.2         | Erythrocyte          | Reticulocyte binding homologue 4             | <i>P. falciparum</i>              |
| Pmmsp1       | PvMSP1-19     | Erythrocyte          | Merozoite surface protein 1, 19kD            | <i>P. malariae</i>                |
| Pvmsp1       | PvMSP1-19     | Erythrocyte          | Merozoite surface protein 1, 19kD            | <i>P. vivax</i>                   |
| chPvmsp1     | chPvMSP1-19   | Erythrocyte          | Merozoite surface protein 1, 19kD (Chabaudi) | <i>P. vivax (P. chabaudi)</i>     |
| dd2          | MSP2_DD2      | Erythrocyte          | Merozoite surface protein 2                  | <i>P. falciparum</i> DD2 strain   |

**Supplementary Table S2.** Malaria knowledge and prevention practices reported by Asian migrants surveyed in Angola, 2019, stratifying by province and origin

|                                                           | Luanda  |     |              |                 |     |              | Lunda Sul |    |             |                 |     |              | Zaire   |    |             |                 |    |              |
|-----------------------------------------------------------|---------|-----|--------------|-----------------|-----|--------------|-----------|----|-------------|-----------------|-----|--------------|---------|----|-------------|-----------------|----|--------------|
|                                                           | Chinese |     |              | Southeast Asian |     |              | Chinese   |    |             | Southeast Asian |     |              | Chinese |    |             | Southeast Asian |    |              |
|                                                           | n       | N   | % (95% CI)   | n               | N   | % (95% CI)   | n         | N  | % (95% CI)  | n               | N   | % (95% CI)   | n       | N  | % (95% CI)  | n               | N  | % (95% CI)   |
| Knows malaria exists in Angola                            | 137     | 149 | 92 (86-96)   | 114             | 138 | 83 (75-88)   | 87        | 90 | 97 (90-99)  | 193             | 215 | 90 (85-93)   | 91      | 96 | 95 (88-98)  | 27              | 28 | 96 (80-100)  |
| Feels at risk of malaria                                  | 73      | 148 | 49 (41-58)   | 93              | 138 | 67 (59-75)   | 68        | 88 | 77 (67-85)  | 177             | 216 | 82 (76-87)   | 85      | 96 | 89 (80-94)  | 25              | 28 | 89 (71-97)   |
| Knows malaria spread by mosquitoes                        | 130     | 153 | 85 (78-90)   | 110             | 143 | 77 (69-83)   | 76        | 90 | 84 (75-91)  | 193             | 219 | 88 (83-92)   | 90      | 96 | 94 (86-97)  | 27              | 29 | 93 (76-99)   |
| Heard communication about malaria in last 6 months        | 61      | 143 | 43 (35-51)   | 66              | 129 | 51 (42-60)   | 37        | 89 | 42 (31-53)  | 104             | 217 | 48 (41-55)   | 46      | 96 | 48 (38-58)  | 12              | 29 | 41 (24-61)   |
| Source of information on malaria                          |         |     |              |                 |     |              |           |    |             |                 |     |              |         |    |             |                 |    |              |
| Friends/family                                            | 33      | 61  | 54 (41-67)   | 34              | 66  | 52 (39-64)   | 21        | 37 | 57 (40-72)  | 66              | 104 | 63 (53-73)   | 33      | 46 | 72 (56-84)  | 9               | 12 | 75 (43-93)   |
| TV/radio                                                  | 12      | 61  | 20 (11-32)   | 43              | 66  | 65 (52-76)   | 4         | 37 | 11 (4-26)   | 34              | 104 | 33 (24-43)   | 16      | 46 | 35 (22-50)  | 5               | 12 | 42 (16-71)   |
| Poster/leaflet                                            | 13      | 61  | 21 (12-34)   | 6               | 66  | 9 (4-19)     | 7         | 37 | 19 (9-36)   | 29              | 104 | 28 (20-38)   | 6       | 46 | 13 (5-27)   | 4               | 12 | 33 (11-65)   |
| Employer                                                  | 4       | 61  | 7 (2-17)     | 22              | 66  | 33 (23-46)   | 9         | 37 | 24 (12-42)  | 44              | 104 | 42 (33-52)   | 24      | 46 | 52 (37-67)  | 6               | 12 | 50 (25-75)   |
| Other                                                     | 10      | 61  | 16 (9-29)    | 31              | 66  | 47 (35-60)   | 13        | 37 | 35 (21-53)  | 44              | 104 | 42 (33-52)   | 23      | 46 | 50 (36-64)  | 4               | 12 | 33 (11-65)   |
| Received information about malaria from employer          | 110     | 142 | 77 (70-84)   | 54              | 109 | 50 (40-59)   | 61        | 79 | 77 (66-86)  | 125             | 199 | 63 (56-69)   | 81      | 91 | 89 (80-94)  | 22              | 27 | 81 (61-93)   |
| Received information about chemoprophylaxis from employer | 68      | 140 | 49 (40-57)   | 38              | 102 | 37 (28-47)   | 49        | 80 | 61 (50-72)  | 101             | 194 | 52 (45-59)   | 68      | 90 | 76 (65-84)  | 16              | 26 | 62 (41-79)   |
| Uses bed net                                              | 84      | 155 | 54 (46-62)   | 75              | 144 | 52 (44-60)   | 85        | 90 | 94 (87-98)  | 179             | 219 | 82 (76-86)   | 82      | 96 | 85 (76-92)  | 21              | 29 | 72 (53-87)   |
| Long-lasting insecticide treated net                      | 53      | 84  | 63 (52-73)   | 29              | 75  | 39 (28-51)   | 75        | 85 | 88 (79-94)  | 160             | 179 | 89 (84-93)   | 78      | 82 | 95 (87-98)  | 17              | 21 | 81 (57-94)   |
| Source of net                                             |         |     |              |                 |     |              |           |    |             |                 |     |              |         |    |             |                 |    |              |
| Brought net from home                                     | 26      | 84  | 31 (22-42)   | 37              | 75  | 49 (38-61)   | 21        | 85 | 25 (16-35)  | 110             | 179 | 61 (54-69)   | 35      | 82 | 43 (32-54)  | 16              | 21 | 76 (52-91)   |
| Bought net in Angola                                      | 50      | 84  | 60 (48-70)   | 15              | 75  | 20 (12-31)   | 49        | 85 | 58 (46-68)  | 39              | 179 | 22 (16-29)   | 30      | 82 | 37 (26-48)  | 4               | 21 | 19 (6-43)    |
| Other                                                     | 8       | 84  | 10 (4-18)    | 23              | 75  | 31 (21-43)   | 15        | 85 | 18 (11-28)  | 30              | 179 | 17 (12-23)   | 17      | 82 | 21 (13-31)  | 1               | 21 | 5 (0.2-26)   |
| Slept under net last night                                | 79      | 84  | 94 (86-98)   | 65              | 75  | 87 (76-93)   | 84        | 85 | 99 (93-100) | 178             | 179 | 99 (96-100)  | 81      | 82 | 99 (92-100) | 21              | 21 | 100 (81-100) |
| Travels with bed net                                      | 15      | 53  | 28 (17-43)   | 13              | 32  | 41 (24-59)   | 18        | 66 | 27 (17-40)  | 33              | 134 | 25 (18-33)   | 33      | 69 | 48 (36-60)  | 9               | 18 | 50 (29-71)   |
| Uses other forms of malaria prevention                    |         |     |              |                 |     |              |           |    |             |                 |     |              |         |    |             |                 |    |              |
| Insecticide spray                                         | 50      | 155 | 32 (25-40)   | 83              | 144 | 58 (49-66)   | 59        | 90 | 66 (55-75)  | 120             | 219 | 55 (48-61)   | 57      | 96 | 59 (49-69)  | 11              | 29 | 38 (21-58)   |
| Fan/Air conditioning                                      | 22      | 155 | 14 (9-21)    | 81              | 144 | 56 (48-64)   | 29        | 90 | 32 (23-43)  | 86              | 219 | 39 (33-46)   | 59      | 96 | 61 (51-71)  | 15              | 29 | 52 (33-70)   |
| Repellent                                                 | 29      | 155 | 19 (13-26)   | 51              | 144 | 35 (28-44)   | 35        | 90 | 39 (29-50)  | 73              | 219 | 33 (27-40)   | 42      | 96 | 44 (34-54)  | 7               | 29 | 24 (11-44)   |
| Coil                                                      | 21      | 155 | 14 (9-20)    | 6               | 144 | 4 (2-9)      | 27        | 90 | 30 (21-41)  | 19              | 219 | 9 (5-13)     | 11      | 96 | 11 (6-20)   | 1               | 29 | 3 (0.2-20)   |
| Screens                                                   | 4       | 155 | 3 (0.8-7)    | 32              | 144 | 22 (16-30)   | 0         | 90 | 0 (0-5)     | 18              | 219 | 8 (5-13)     | 5       | 96 | 5 (2-12)    | 0               | 29 | 0 (0-15)     |
| Indoor residual spraying                                  | 5       | 155 | 3 (1-8)      | 24              | 144 | 17 (11-24)   | 4         | 90 | 4 (1-12)    | 12              | 219 | 5 (3-10)     | 1       | 96 | 1 (0.05-6)  | 0               | 29 | 0 (0-15)     |
| Electric fly swatter                                      | 3       | 155 | 2 (0.5-6)    | 0               | 144 | 0 (0-3)      | 3         | 90 | 3 (0.9-10)  | 0               | 219 | 0 (0-2)      | 2       | 96 | 2 (0.4-8)   | 0               | 29 | 0 (0-15)     |
| Long-sleeved clothing/socks                               | 1       | 155 | 0.6 (0.03-4) | 1               | 144 | 0.7 (0.04-4) | 1         | 90 | 1 (0.06-7)  | 1               | 219 | 0.5 (0.02-3) | 1       | 96 | 1 (0.05-6)  | 0               | 29 | 0 (0-15)     |
| Chemoprophylaxis                                          | 1       | 155 | 0.6 (0.03-4) | 1               | 144 | 0.7 (0.04-4) | 1         | 90 | 1 (0.06-7)  | 0               | 219 | 0 (0-2)      | 0       | 96 | 0 (0-5)     | 0               | 29 | 0 (0-15)     |
| No malaria prevention reported                            | 2       | 155 | 1 (0.2-5)    | 1               | 144 | 0.7 (0.04-4) | 0         | 90 | 0 (0-5)     | 1               | 219 | 0.5 (0.02-3) | 0       | 96 | 0 (0-5)     | 0               | 29 | 0 (0-15)     |

**Supplementary Table S3.** Healthcare seeking practices for febrile illness reported by Asian migrants surveyed in Angola, 2019, stratifying by province and origin

|                                       | Luanda  |     |              |                 |     |             | Lunda Sul |    |              |                 |     |            | Zaire   |    |              |                 |    |              |
|---------------------------------------|---------|-----|--------------|-----------------|-----|-------------|-----------|----|--------------|-----------------|-----|------------|---------|----|--------------|-----------------|----|--------------|
|                                       | Chinese |     |              | Southeast Asian |     |             | Chinese   |    |              | Southeast Asian |     |            | Chinese |    |              | Southeast Asian |    |              |
|                                       | n       | N   | % (95% CI)   | n               | N   | % (95% CI)  | n         | N  | % (95% CI)   | n               | N   | % (95% CI) | n       | N  | % (95% CI)   | n               | N  | % (95% CI)   |
| Had fever in last 3 months            | 9       | 152 | 6 (3-11)     | 13              | 142 | 9 (5-15)    | 3         | 90 | 3 (0.9-10)   | 17              | 219 | 8 (5-12)   | 6       | 96 | 6 (3-14)     | 5               | 29 | 17 (7-36)    |
| Self-medicated                        | 3       | 9   | 33 (9-69)    | 6               | 13  | 46 (20-74)  | 0         | 3  | 0 (0-69)     | 4               | 17  | 24 (8-50)  | 0       | 6  | 0 (0-48)     | 1               | 5  | 20 (1-70)    |
| Sought healthcare                     | 5       | 9   | 56 (23-85)   | 6               | 13  | 46 (20-74)  | 3         | 3  | 100 (31-100) | 12              | 17  | 71 (44-89) | 5       | 6  | 83 (36-99)   | 3               | 5  | 60 (17-93)   |
| Setting for healthcare seeking        |         |     |              |                 |     |             |           |    |              |                 |     |            |         |    |              |                 |    |              |
| Public health facility                | 2       | 5   | 40 (7-83)    | 1               | 6   | 17 (0.9-64) | 1         | 3  | 33 (2-87)    | 4               | 12  | 33 (11-65) | 2       | 5  | 40 (7-83)    | 0               | 3  | 0 (0-69)     |
| Private health facility/pharmacy      | 3       | 5   | 60 (17-93)   | 3               | 6   | 50 (19-81)  | 2         | 3  | 67 (13-98)   | 7               | 12  | 58 (29-84) | 3       | 5  | 60 (17-93)   | 3               | 3  | 100 (31-100) |
| Employer health facility              | 0       | 5   | 0 (0-54)     | 2               | 6   | 33 (6-76)   | 0         | 3  | 0 (0-69)     | 1               | 12  | 8 (0.4-40) | 0       | 5  | 0 (0-54)     | 0               | 3  | 0 (0-69)     |
| Tested for malaria                    | 4       | 9   | 44 (15-77)   | 6               | 13  | 46 (20-74)  | 3         | 3  | 100 (31-100) | 12              | 17  | 71 (44-89) | 5       | 6  | 83 (36-99)   | 3               | 5  | 60 (17-93)   |
| Took antimalarial drug                | 3       | 9   | 33 (9-69)    | 5               | 13  | 38 (15-68)  | 3         | 3  | 100 (31-100) | 7               | 17  | 41 (19-67) | 5       | 6  | 83 (36-99)   | 3               | 5  | 60 (17-93)   |
| Following positive test               | 1       | 3   | 33 (2-87)    | 3               | 5   | 60 (17-93)  | 2         | 3  | 67 (13-98)   | 6               | 7   | 86 (42-99) | 5       | 5  | 100 (46-100) | 2               | 3  | 67 (13-98)   |
| Antimalarial drug taken               |         |     |              |                 |     |             |           |    |              |                 |     |            |         |    |              |                 |    |              |
| Artemisinin-based combination therapy | 0       | 2   | 0 (0-80)     | 3               | 5   | 60 (17-93)  | 0         | 1  | 0 (0-95)     | 2               | 9   | 22 (4-60)  | 0       | 3  | 0 (0-69)     | 1               | 2  | 50 (9-91)    |
| Other                                 | 2       | 2   | 100 (20-100) | 2               | 5   | 40 (7-83)   | 1         | 1  | 100 (5-100)  | 7               | 9   | 78 (40-96) | 3       | 3  | 100 (31-100) | 1               | 2  | 50 (9-91)    |

**Supplementary Table S4.** Prevalence of current or past malaria infection in Asian migrants surveyed in Angola, 2019, stratifying by province and origin

|                                             | Luanda  |     |              |                 |     |              | Lunda Sul |    |             |                 |     |              | Zaire   |    |            |                 |    |             |
|---------------------------------------------|---------|-----|--------------|-----------------|-----|--------------|-----------|----|-------------|-----------------|-----|--------------|---------|----|------------|-----------------|----|-------------|
|                                             | Chinese |     |              | Southeast Asian |     |              | Chinese   |    |             | Southeast Asian |     |              | Chinese |    |            | Southeast Asian |    |             |
|                                             | n       | N   | % (95% CI)   | n               | N   | % (95% CI)   | n         | N  | % (95% CI)  | n               | N   | % (95% CI)   | n       | N  | % (95% CI) | n               | N  | % (95% CI)  |
| <b>Current/recent infection</b>             |         |     |              |                 |     |              |           |    |             |                 |     |              |         |    |            |                 |    |             |
| RDT at time of survey                       |         |     |              |                 |     |              |           |    |             |                 |     |              |         |    |            |                 |    |             |
| Any <i>Plasmodium</i> +                     | 3       | 153 | 2 (0.5-6)    | 3               | 142 | 2 (0.5-7)    | 1         | 89 | 1 (0.06-7)  | 3               | 217 | 1 (0.4-4)    | 5       | 95 | 5 (2-12)   | 2               | 29 | 7 (1-24)    |
| Pf+                                         | 1       | 153 | 0.7 (0.03-4) | 2               | 142 | 1 (0.2-6)    | 1         | 89 | 1 (0.06-7)  | 3               | 217 | 1 (0.4-4)    | 3       | 95 | 3 (0.8-10) | 1               | 29 | 3 (0.2-20)  |
| Pv+                                         | 2       | 153 | 1 (0.2-5)    | 0               | 142 | 0 (0-3)      | 0         | 89 | 0 (0-5)     | 0               | 217 | 0 (0-2)      | 2       | 95 | 2 (0.4-8)  | 0               | 29 | 0 (0-15)    |
| Pf+/Pv+                                     | 0       | 153 | 0 (0-3)      | 1               | 142 | 0.7 (0.04-4) | 0         | 89 | 0 (0-5)     | 0               | 217 | 0 (0-2)      | 0       | 95 | 0 (0-5)    | 1               | 29 | 3 (0.2-20)  |
| Negative                                    | 150     | 153 | 98 (94-99)   | 139             | 142 | 98 (93-99)   | 88        | 89 | 99 (93-100) | 214             | 217 | 99 (96-100)  | 90      | 95 | 95 (88-98) | 27              | 29 | 93 (76-99)  |
| Ultrasensitive laboratory antigen detection |         |     |              |                 |     |              |           |    |             |                 |     |              |         |    |            |                 |    |             |
| Any <i>Plasmodium</i> +                     | 1       | 155 | 0.6 (0.03-4) | 7               | 144 | 5 (2-10)     | 2         | 90 | 2 (0.4-9)   | 9               | 219 | 4 (2-8)      | 6       | 94 | 6 (3-14)   | 1               | 29 | 3 (0.2-20)  |
| Pf+                                         | 0       | 155 | 0 (0-3)      | 5               | 144 | 3 (1-8)      | 2         | 90 | 2 (0.4-9)   | 5               | 219 | 2 (0.8-6)    | 6       | 94 | 6 (3-14)   | 1               | 29 | 3 (0.2-20)  |
| Pv+                                         | 0       | 155 | 0 (0-3)      | 0               | 144 | 0 (0-3)      | 0         | 90 | 0 (0-5)     | 0               | 219 | 0 (0-2)      | 0       | 94 | 0 (0-5)    | 0               | 29 | 0 (0-15)    |
| Pf+/Pv+                                     | 0       | 155 | 0 (0-3)      | 1               | 144 | 0.7 (0.04-4) | 0         | 90 | 0 (0-5)     | 2               | 219 | 0.9 (0.2-4)  | 0       | 94 | 0 (0-5)    | 0               | 29 | 0 (0-15)    |
| Pm+ or Po+                                  | 1       | 155 | 0.6 (0.03-4) | 1               | 144 | 0.7 (0.04-4) | 0         | 90 | 0 (0-5)     | 2               | 219 | 0.9 (0.2-4)  | 0       | 94 | 0 (0-5)    | 0               | 29 | 0 (0-15)    |
| Negative                                    | 154     | 155 | 99 (96-100)  | 137             | 144 | 95 (90-98)   | 88        | 90 | 98 (91-100) | 210             | 219 | 96 (92-98)   | 88      | 94 | 94 (86-97) | 28              | 29 | 97 (80-100) |
| <b>Past infection</b>                       |         |     |              |                 |     |              |           |    |             |                 |     |              |         |    |            |                 |    |             |
| Self-reported past malaria infection        |         |     |              |                 |     |              |           |    |             |                 |     |              |         |    |            |                 |    |             |
| In home country                             | 12      | 155 | 8 (4-13)     | 9               | 144 | 6 (3-12)     | 1         | 90 | 1 (0.06-7)  | 14              | 219 | 6 (4-11)     | 3       | 96 | 3 (0.8-10) | 5               | 29 | 17 (7-36)   |
| In Angola                                   | 41      | 154 | 27 (20-34)   | 68              | 144 | 47 (39-56)   | 40        | 90 | 44 (34-55)  | 92              | 219 | 42 (35-49)   | 43      | 96 | 45 (35-55) | 12              | 29 | 41 (24-61)  |
| Laboratory antibody detection               |         |     |              |                 |     |              |           |    |             |                 |     |              |         |    |            |                 |    |             |
| Any <i>Plasmodium</i> +                     | 82      | 155 | 53 (45-61)   | 51              | 144 | 35 (28-44)   | 55        | 90 | 61 (50-71)  | 141             | 219 | 64 (58-71)   | 54      | 84 | 64 (53-74) | 13              | 22 | 59 (37-79)  |
| Pf+                                         | 71      | 155 | 46 (38-54)   | 48              | 144 | 33 (26-42)   | 45        | 90 | 50 (40-60)  | 127             | 219 | 58 (51-65)   | 52      | 84 | 62 (51-72) | 12              | 22 | 55 (33-75)  |
| Pv+                                         | 4       | 155 | 3 (0.8-7)    | 0               | 144 | 0 (0-3)      | 3         | 90 | 3 (0.9-10)  | 1               | 219 | 0.5 (0.02-3) | 0       | 84 | 0 (0-5)    | 0               | 22 | 0 (0-18)    |
| Pf+/Pv+                                     | 7       | 155 | 5 (2-9)      | 2               | 144 | 1 (0.2-5)    | 6         | 90 | 7 (3-14)    | 12              | 219 | 5 (3-10)     | 2       | 84 | 2 (0.4-9)  | 1               | 22 | 5 (0.2-25)  |
| Pm+                                         | 0       | 155 | 0 (0-3)      | 5               | 144 | 3 (1-8)      | 8         | 90 | 9 (4-17)    | 3               | 219 | 1 (0.4-4)    | 0       | 84 | 0 (0-5)    | 0               | 22 | 0 (0-18)    |
| Negative                                    | 73      | 155 | 47 (39-55)   | 93              | 144 | 65 (56-72)   | 35        | 90 | 39 (29-50)  | 78              | 219 | 36 (29-42)   | 30      | 84 | 36 (26-47) | 9               | 22 | 41 (21-63)  |

RDT: rapid diagnostic test; Pf: *P. falciparum* ; Pv: *P. vivax* ; Pm: *P. malariae* ; Po: *P. ovale*

**Supplementary Table S5.** Distribution of antigen profiles in Asian migrants in Angola, 2019

| pfHRP2 | pAldo | pLDH | pVLDH | Interpretation           | N, frequency<br>(N=731) | Pf RDT+     | Pv RDT+      | Seropositive for<br>any Pf | Seropositive for<br>any Pv |
|--------|-------|------|-------|--------------------------|-------------------------|-------------|--------------|----------------------------|----------------------------|
| -      | -     | -    | -     | No malaria infection     | 705 (96.4%)             | 8/697 ( 1%) | 6/697 (0.9%) | 368/705 ( 52%)             | 33/705 ( 5%)               |
| -      | +     | -    | -     | low level non-Pf, non-Pv | 1 ( 0.1%)               | 0/1 ( 0%)   | 0/1 (0.0%)   | 1/1 (100%)                 | 0/1 ( 0%)                  |
| -      | -     | +    | -     | low level non-Pf, non-Pv | 3 ( 0.4%)               | 0/3 ( 0%)   | 0/3 (0.0%)   | 2/3 ( 67%)                 | 0/3 ( 0%)                  |
| -      | +     | +    | -     | non-Pf, non-Pv           | 0 ( 0.0%)               | -           | -            | -                          | -                          |
| +      | +     | -    | -     | low/recent Pf            | 2 ( 0.3%)               | 0/2 ( 0%)   | 0/2 (0.0%)   | 2/2 (100%)                 | 0/2 ( 0%)                  |
| +      | -     | -    | -     | recent Pf                | 7 ( 1.0%)               | 0/7 ( 0%)   | 0/7 (0.0%)   | 2/7 ( 29%)                 | 1/7 ( 14%)                 |
| +      | -     | +    | -     | low/recent Pf            | 10 ( 1.4%)              | 4/10 ( 40%) | 0/10 (0.0%)  | 7/10 ( 70%)                | 2/10 ( 20%)                |
| +      | +     | +    | -     | active Pf                | 0 ( 0.0%)               | -           | -            | -                          | -                          |
| +      | -     | -    | +     | recent Pf, active Pv     | 1 ( 0.1%)               | 0/1 ( 0%)   | 0/1 (0.0%)   | 1/1 (100%)                 | 1/1 (100%)                 |
| +      | +     | -    | +     | recent Pf, active Pv     | 0 ( 0.0%)               | -           | -            | -                          | -                          |
| +      | -     | +    | +     | recent Pf, active Pv     | 1 ( 0.1%)               | 0/1 ( 0%)   | 0/1 (0.0%)   | 1/1 (100%)                 | 1/1 (100%)                 |
| -      | -     | +    | +     | active Pv                | 0 ( 0.0%)               | -           | -            | -                          | -                          |
| -      | +     | -    | +     | active Pv                | 0 ( 0.0%)               | -           | -            | -                          | -                          |
| -      | -     | -    | +     | active Pv                | 0 ( 0.0%)               | -           | -            | -                          | -                          |
| -      | +     | +    | +     | active Pv                | 0 ( 0.0%)               | -           | -            | -                          | -                          |
| +      | +     | +    | +     | active Pf, active Pv     | 1 ( 0.1%)               | 1/1 (100%)  | 0/1 (0.0%)   | 1/1 (100%)                 | 0/1 ( 0%)                  |

RDT: rapid diagnostic test; Pf: *P. falciparum* ; Pv: *P. vivax*



**Supplementary Table S6.** Association between seropositivity to *Plasmodium* antigens and four key variables in Asian migrants in Angola, 2019

| Antigen  | Recent arrival    |                      |             | Active infection  |                     |             | Malaria at home   |                    |             | Ever had malaria     |                      |             |
|----------|-------------------|----------------------|-------------|-------------------|---------------------|-------------|-------------------|--------------------|-------------|----------------------|----------------------|-------------|
|          | Yes               | No                   | p-value     | Yes               | No                  | p-value     | Yes               | No                 | p-value     | Yes                  | No                   | p-value     |
| SBP1     | 1/29 (3%)         | 69/685 (10%)         | 0.39        | 5/25 (20%)        | 65/689 (9%)         | 0.16        | 6/43 (14%)        | 64/671 (10%)       | 0.50        | <b>38/288 (13%)</b>  | <b>32/425 (8%)</b>   | <b>0.02</b> |
| PfMSP1   | <b>7/29 (24%)</b> | <b>293/685 (43%)</b> | <b>0.07</b> | 10/25 (40%)       | 290/689 (42%)       | 1.00        | 24/43 (56%)       | 276/671 (41%)      | 0.08        | <b>181/288 (63%)</b> | <b>119/425 (28%)</b> | <b>0.00</b> |
| CH150    | 0/29 (0%)         | 1/685 (0.1%)         | 1.00        | 0/25 (0%)         | 1/689 (0.1%)        | 1.00        | 0/43 (0%)         | 1/671 (0.1%)       | 1.00        | 1/288 (0.3%)         | 0/425 (0%)           | 0.84        |
| E181     | 0/29 (0%)         | 3/685 (0.4%)         | 1.00        | 1/25 (4%)         | 2/689 (0.3%)        | 0.21        | 0/43 (0%)         | 3/671 (0.4%)       | 1.00        | 3/288 (1%)           | 0/425 (0%)           | 0.13        |
| LSA1     | 0/29 (0%)         | 8/685 (1%)           | 1.00        | 1/25 (4%)         | 7/689 (1%)          | 0.67        | 0/43 (0%)         | 8/671 (1%)         | 1.00        | 5/288 (2%)           | 3/425 (0.7%)         | 0.36        |
| HP2      | 0/29 (0%)         | 0/685 (0%)           | -           | 0/25 (0%)         | 0/689 (0%)          | -           | 0/43 (0%)         | 0/671 (0%)         | -           | 0/288 (0%)           | 0/425 (0%)           | -           |
| PfAMA1   | 1/29 (3%)         | 78/685 (11%)         | 0.30        | 6/25 (24%)        | 73/689 (11%)        | 0.08        | 8/43 (19%)        | 71/671 (11%)       | 0.17        | <b>55/288 (19%)</b>  | <b>24/425 (6%)</b>   | <b>0.00</b> |
| HRP2     | 0/29 (0%)         | 39/685 (6%)          | 0.37        | 3/25 (12%)        | 36/689 (5%)         | 0.31        | 4/43 (9%)         | 35/671 (5%)        | 0.43        | <b>25/288 (9%)</b>   | <b>14/425 (3%)</b>   | <b>0.00</b> |
| GLURPO   | 0/29 (0%)         | 32/685 (5%)          | 0.46        | <b>5/25 (20%)</b> | <b>27/689 (4%)</b>  | <b>0.00</b> | 3/43 (7%)         | 29/671 (4%)        | 0.66        | <b>26/288 (9%)</b>   | <b>6/425 (1%)</b>    | <b>0.00</b> |
| PvMSP1   | 0/29 (0%)         | 11/685 (2%)          | 1.00        | <b>2/25 (8%)</b>  | <b>9/689 (1%)</b>   | <b>0.07</b> | 0/43 (0%)         | 11/671 (2%)        | 0.84        | 4/288 (1%)           | 7/425 (2%)           | 1.00        |
| PmMSP1   | 0/29 (0%)         | 15/685 (2%)          | 0.89        | 1/25 (4%)         | 14/689 (2%)         | 1.00        | 2/43 (5%)         | 13/671 (2%)        | 0.51        | 10/288 (3%)          | 5/425 (1%)           | 0.07        |
| CHPvMSP1 | 1/29 (3%)         | 37/685 (5%)          | 0.97        | <b>5/25 (20%)</b> | <b>33/689 (5%)</b>  | <b>0.00</b> | 2/43 (5%)         | 36/671 (5%)        | 1.00        | 18/288 (6%)          | 20/425 (5%)          | 0.46        |
| ETR5     | 0/29 (0%)         | 44/685 (6%)          | 0.31        | <b>6/25 (24%)</b> | <b>38/689 (6%)</b>  | <b>0.00</b> | <b>6/43 (14%)</b> | <b>38/671 (6%)</b> | <b>0.06</b> | <b>33/288 (11%)</b>  | <b>11/425 (3%)</b>   | <b>0.00</b> |
| HSP40    | 0/29 (0%)         | 26/685 (4%)          | 0.57        | 3/25 (12%)        | 23/689 (3%)         | 0.08        | 4/43 (9%)         | 22/671 (3%)        | 0.10        | <b>22/288 (8%)</b>   | <b>4/425 (0.9%)</b>  | <b>0.00</b> |
| CSP      | 0/29 (0%)         | 0/685 (0%)           | -           | 0/25 (0%)         | 0/689 (0%)          | -           | 0/43 (0%)         | 0/671 (0%)         | -           | 0/288 (0%)           | 0/425 (0%)           | -           |
| H103     | 0/29 (0%)         | 10/685 (1%)          | 1.00        | 1/25 (4%)         | 9/689 (1%)          | 0.80        | 2/43 (5%)         | 8/671 (1%)         | 0.23        | 7/288 (2%)           | 3/425 (0.7%)         | 0.11        |
| GLURP2   | <b>0/29 (0%)</b>  | <b>95/685 (14%)</b>  | <b>0.06</b> | <b>8/25 (32%)</b> | <b>87/689 (13%)</b> | <b>0.01</b> | 10/43 (23%)       | 85/671 (13%)       | 0.08        | <b>70/288 (24%)</b>  | <b>25/425 (6%)</b>   | <b>0.00</b> |
| E140     | 1/29 (3%)         | 34/685 (5%)          | 1.00        | 3/25 (12%)        | 32/689 (5%)         | 0.23        | 5/43 (12%)        | 30/671 (4%)        | 0.08        | <b>21/288 (7%)</b>   | <b>14/425 (3%)</b>   | <b>0.02</b> |
| ETR4     | 1/29 (3%)         | 28/685 (4%)          | 1.00        | <b>5/25 (20%)</b> | <b>24/689 (3%)</b>  | <b>0.00</b> | 2/43 (5%)         | 27/671 (4%)        | 1.00        | 14/288 (5%)          | 15/425 (4%)          | 0.49        |
| RH42     | 1/29 (3%)         | 55/685 (8%)          | 0.58        | <b>5/25 (20%)</b> | <b>51/689 (7%)</b>  | <b>0.05</b> | <b>7/43 (16%)</b> | <b>49/671 (7%)</b> | <b>0.07</b> | <b>38/288 (13%)</b>  | <b>18/425 (4%)</b>   | <b>0.00</b> |
| SEA1     | 1/29 (3%)         | 26/685 (4%)          | 1.00        | <b>4/25 (16%)</b> | <b>23/689 (3%)</b>  | <b>0.01</b> | 2/43 (5%)         | 25/671 (4%)        | 1.00        | 12/288 (4%)          | 15/425 (4%)          | 0.81        |
| RH5      | 0/29 (0%)         | 8/685 (1%)           | 1.00        | 1/25 (4%)         | 7/689 (1%)          | 0.67        | 1/43 (2%)         | 7/671 (1%)         | 0.98        | 5/288 (2%)           | 3/425 (0.7%)         | 0.36        |
| GEXP     | 4/29 (14%)        | 48/685 (7%)          | 0.31        | 2/25 (8%)         | 50/689 (7%)         | 1.00        | 3/43 (7%)         | 49/671 (7%)        | 1.00        | 25/288 (9%)          | 27/425 (6%)          | 0.30        |
| DD2      | 0/29 (0%)         | 39/685 (6%)          | 0.37        | <b>5/25 (20%)</b> | <b>34/689 (5%)</b>  | <b>0.00</b> | <b>6/43 (14%)</b> | <b>33/671 (5%)</b> | <b>0.03</b> | <b>28/288 (10%)</b>  | <b>10/425 (2%)</b>   | <b>0.00</b> |
